# Supplementary material for: The injured sciatic nerve atlas (iSNAT), insights into the cellular and molecular basis of neural tissue degeneration and regeneration
Source: eLife journal article supplement (doi:10.7554/elife.80881), 2022-12-14
Supplement: fig4-figsupp1-data1 [file elife-80881-fig4-figsupp1-data1-v2.zip]

15

15

15

Injury
