# Supplementary figures and images for: The injured sciatic nerve atlas (iSNAT), insights into the cellular and molecular basis of neural tissue degeneration and regeneration
Source: eLife journal article supplement (doi:10.7554/elife.80881), 2022-12-14

WT Naive  
10/22/21

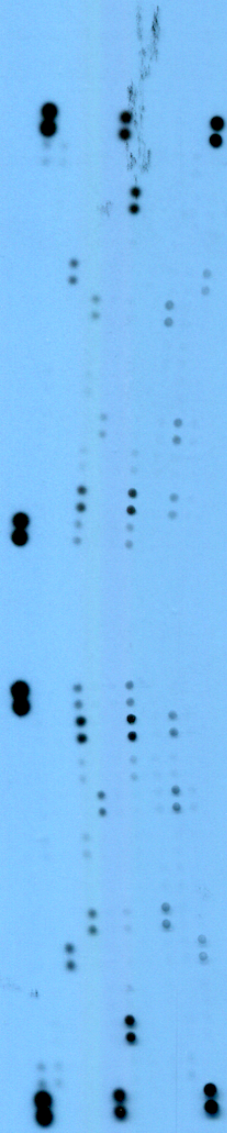

30 sec

1 min

2 min

5 min

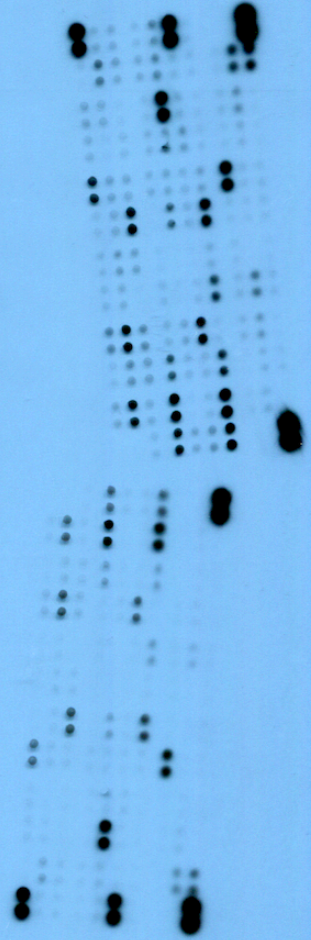

Supplement: fig1-figsupp1-data1 [file Fig1-Supp3-A_source data_ELISA of WT-Naive-Sciatic-Nerve.pdf › Fig-1_Suppl-3-source data_ELISA original X-ray films/Fig1-Supp3-A_source data_ELISA of WT-Naive-Sciatic-Nerve.pdf]

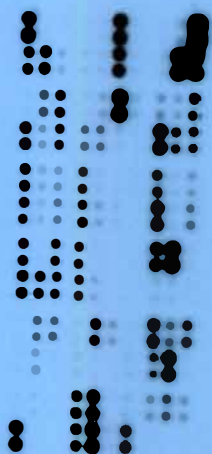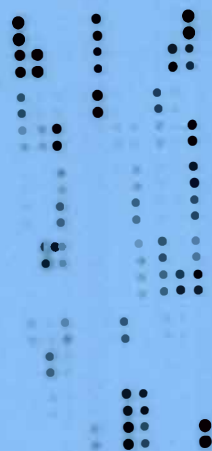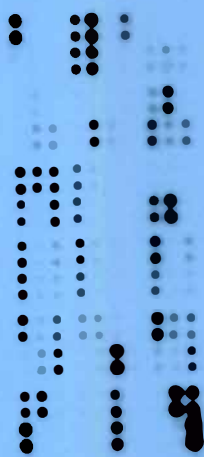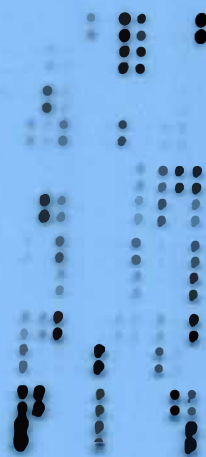

Supplement: fig1-figsupp1-data1 [file Fig1-Supp3-D_source data_ELISA of WT-Naive-Blood-Serum.pdf › Fig-1_Suppl-3-source data_ELISA original X-ray films/Fig1-Supp3-D_source data_ELISA of WT-Naive-Blood-Serum.pdf]

WT  
 SNC  
 1opi  
 Injury  
 Site  
 1/12/22  
 200mg

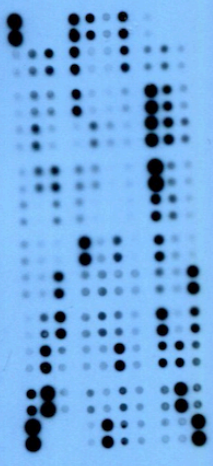

2 minute

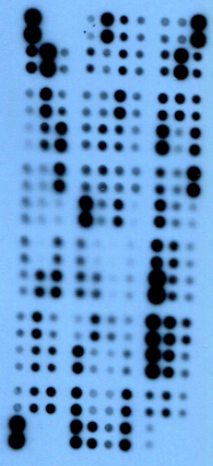

5 minute

~~2 weeks~~

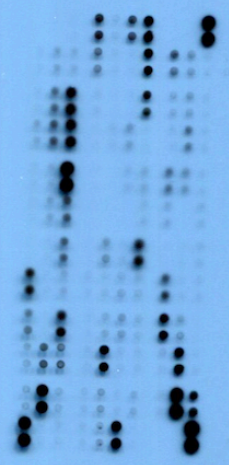

1 minute

~~2 weeks~~

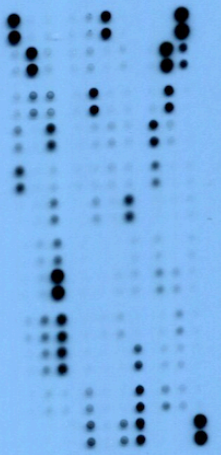

30 seconds

Supplement: fig4-figsupp1-data1 [file elife-80881-fig4-figsupp1-data1-v2.zip]

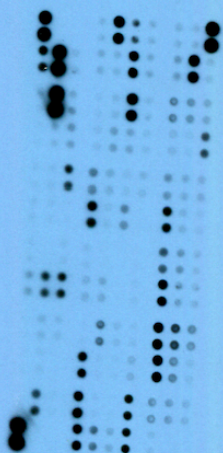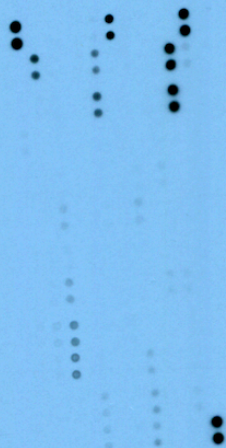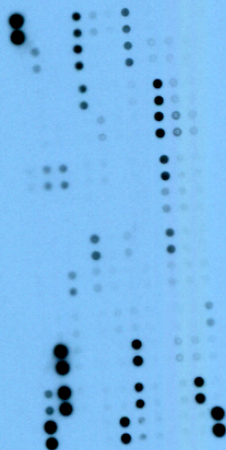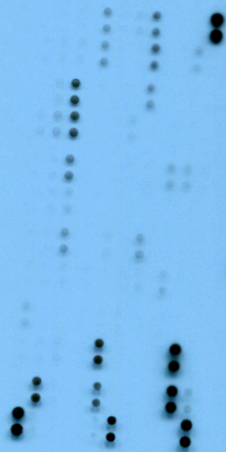

Supplement: fig4-figsupp1-data1 [file elife-80881-fig4-figsupp1-data1-v2.zip]

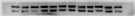

Supplement: fig9-data1 [file elife-80881-fig9-data1-v3.zip]



1 2 3 4 5 6 7 8 9 10 11 12

1000

Supplement: fig9-data1 [file elife-80881-fig9-data1-v3.zip]
